# Supplementary material for: Periodontal Disease and Breast Cancer Risk: Results from the Nurses' Health Study
Source: Oxford University Press journal article supplement (doi:10.1158/1055-9965.epi-21-0257), 2021-06-29
Supplement: 10559965epi210257-sup-261342_2_supp_7140581_qtmfdb.docx [file 10559965epi210257-sup-261342_2_supp_7140581_qtmfdb.docx]

**Table S3**. Associations of periodontal bone loss and breast cancer by estrogen and progesterone receptor status during 14 years of follow-up in the Nurses’ Health Study (n = 77,541), 1998-2014.

| **Subtype** | No. of cases | No periodontal bone loss  (reference) | Periodontal bone loss HR (95% CI) a |
| --- | --- | --- | --- |
| ER+ | 3562 | 1.00 | 1.00 (0.91, 1.10) |
| ER- | 612 | 1.00 | 1.08 (0.86, 1.35) |
| ER+/PR+ | 2905 | 1.00 | 1.01 (0.91, 1.12) |
| ER+/PR- | 578 | 1.00 | 0.94 (0.74, 1.19) |
| ER-/PR- | 566 | 1.00 | 1.15 (0.91, 1.44) |

Abbreviations: CI, confidence interval; HR, hazard ratio.

a Multivariable-adjusted models for the following covariates: **age** (months), **race** (nonwhite or white**), body mass index at age 18 years** (weight(kg)/height(m)2), <18.5, 18.5-24.9, 25.0-29.9, ≥30, or missing), **age at menarche** (<12, 12, 13, ≥14 years), **age at first birth and parity combined** (nulliparous, <25 years and 1 child, 25+ years and 1 child, <25 years and 2 children, 25+ years and 2 children, <25 years and >2 children, 25+ years and >2 children, or missing), **age at menopause and menopausal status** (premenopausal, <45 years and post-menopausal, 45-49 years and post-menopausal 50-52 years, post-menopausal 53+ years, or unknown status), **first degree family history of breast cancer** (yes, no, or missing), **history of benign breast disease** (ever/never), **alcohol consumption** (nondrinker, quartile 1, quartile 2, quartile 3, quartile 4, or missing), **physical activity** (<8 MET, 8-16 MET, 16-24 MET, 24+ MET, or missing), **ever mammography** (never/ever), **smoking status** (never, former, current smoker), **pack years smoking** (none, 0-10 years, 10-20 years, 20-30 years, 30-40 years, 40+ years, or unknown pack years), **weight change since 18** (lost at least 2 kg, stable, gained 2-5 kg, gained 5-10 kg, gained 10-20 kg, gained 20-25 kg, gained >25 kg, or missing), **menopausal hormone therapy** (never or ever), and **oral contraceptive use** (never or ever).
