# Supplementary material for: Periodontal Disease and Breast Cancer Risk: Results from the Nurses' Health Study
Source: Oxford University Press journal article supplement (doi:10.1158/1055-9965.epi-21-0257), 2021-06-29
Supplement: 10559965epi210257-sup-261342_2_supp_7140583_qtmfdb.docx [file 10559965epi210257-sup-261342_2_supp_7140583_qtmfdb.docx]

**Table S1**. Associations of periodontal bone loss and breast cancer during 14 years of follow-up in the Nurses’ Health Study stratified by risk factors (n = 77,541), 1998-2014.

|  | No. of cases | No periodontal bone loss (reference) | Periodontal bone loss HR (95% CI)a | P-interaction |
| --- | --- | --- | --- | --- |
| Age  <64 years old  ≥64 years old | 1208  3902 | 1.00  1.00 | 1.11 (0.95, 1.30)  0.99 (0.90, 1.08) | 0.08 |
| Number of teeth  0-16 teeth  16-24 teeth  25-32 teeth | 689  851  3010 | 1.00  1.00  1.00 | 0.99 (0.80, 1.20)  1.07 (0.89, 1.29)  0.98 (0.88, 1.10) | 0.76 |
| BMI  <25 kg/m2  ≥25 kg/m2 | 2029  3006 | 1.00  1.00 | 0.97 (0.86, 1.11)  1.03 (0.93, 1.14) | 0.88 |
| Smoking quit years  Former <20 years  Former ≥20 years  Current  Never | 902  1562  384  2243 | 1.00  1.00  1.00  1.00 | 0.98 (0.83, 1.15)  1.11 (0.96, 1.27)  0.97 (0.75, 1.24)  1.01 (0.88, 1.16) | 0.92 |
| Smoke status  Never  Former  Current | 2254  2471  385 | 1.00  1.00  1.00 | 1.00 (0.87, 1.15)  1.04 (0.94, 1.16)  0.96 (0.75, 1.23) | 0.98 |
| Aspirin/NSAID use  None  Aspirin only  NSAID only | 1565  1526  759 | 1.00  1.00  1.00 | 1.10 (0.96, 1.27)  0.92 (0.79, 1.07)  1.03 (0.84, 1.26) | 0.61 |
| HT therapy  Never  Ever | 1236  3874 | 1.00  1.00 | 1.05 (0.89, 1.24)  1.01 (0.93, 1.11) | 0.91 |

Abbreviations: CI, confidence interval; HR, hazard ratio.

aMultivariable-adjusted models for the following covariates: age (months), race, body mass index at age 18, age at menarche, age at first birth and parity combined, age at menopause and menopausal status, first degree family history of breast cancer, history of benign breast disease, alcohol consumption, physical activity, ever mammography, smoking status, pack years smoking, weight change since 18, menopausal hormone therapy, and oral contraceptive use.
